# Supplementary material for: Performance improvement of perovskite solar cells by employing a CdSe quantum dot/PCBM composite as an electron transport layer
Source: Royal Society of Chemistry journal article supplement (doi:10.1039/c7ta00203c), 2017-01-01
Supplement: c7ta00203c1.pdf [file c7ta00203c1.pdf]

Electronic Supplementary Material (ESI) for Journal of Materials Chemistry A  
This journal is © The Royal Society of Chemistry 2017

## Supporting Information

### Performance Improvement of Perovskite Solar Cell by Employing CdSe Quantum Dot/PCBM Composite as Electron Transport Layer

Xiaofeng Zeng,<sup>†a</sup> Tingwei Zhou,<sup>†a</sup> Chongqian Leng,<sup>b</sup> Zhigang Zang,<sup>\*a</sup> Ming Wang,<sup>a</sup> Wei Hu,<sup>a</sup>  
Xiaosheng Tang,<sup>a</sup> Shirong Lu,<sup>b</sup> Liang Fang<sup>c</sup> and Miao Zhou<sup>\*a</sup>

<sup>a</sup> Key Laboratory of Optoelectronic Technology & Systems (Ministry of Education), College of Optoelectronic Engineering, Chongqing University, Chongqing 400044, China. <sup>†</sup>These authors contribute equally to the paper.

\* Email: zangzg@cqu.edu.cn, mzhou@cqu.edu.cn.

<sup>b</sup> Chongqing Institute of Green and Intelligent Technology, Chinese Academy of Sciences, Chongqing 401122, China.

<sup>c</sup> Department of Applied Physics, College of Physics, Chongqing University, Chongqing 401331, China.

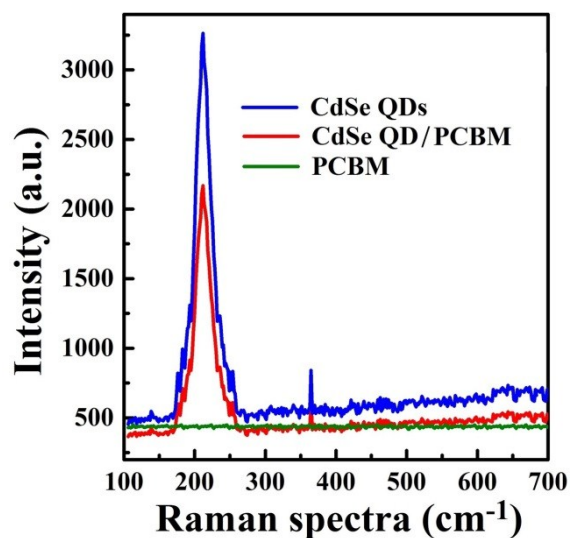

Figure S1. Raman spectra of CdSe QDs, CdSe QD/PCBM composite and PCBM.

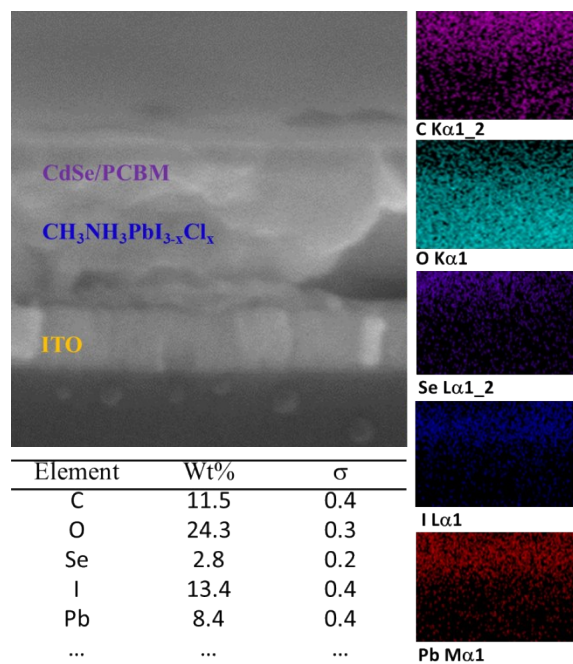

**Figure S2.** Cross-sectional SEM image, EDS elemental mapping and compositional analysis of CdSe/PCBM composites on  $\text{CH}_3\text{NH}_3\text{PbI}_{3-x}\text{Cl}_x$  perovskite.

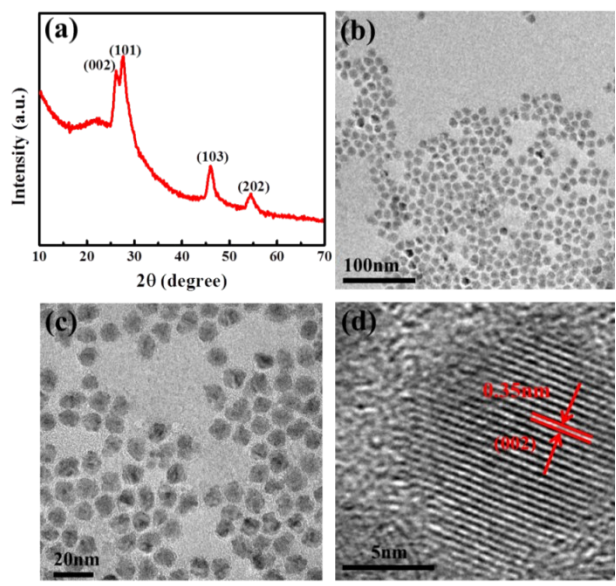

**Figure S3.** (a) XRD pattern, (b-c) TEM and (d) HRTEM of pure CdSe QDs.

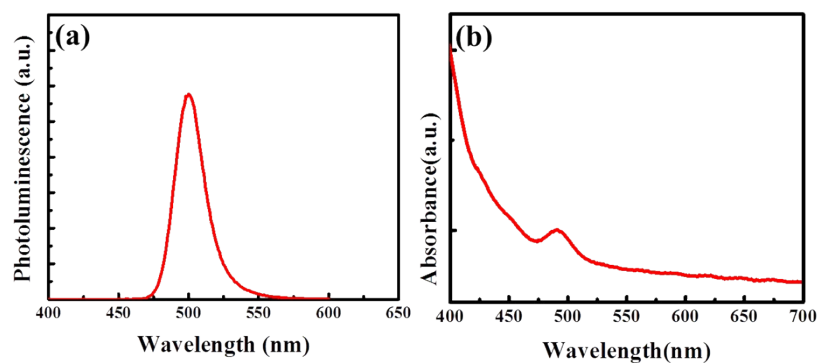

**Figure S4.** (a) PL spectra and (b) UV-vis spectra of pure CdSe QDs.

**Table S1.** Photovoltaic parameters measured from a batch of 30 devices with CdSe/PCBM composite as ETL for solar cells.

| PCE (%) | $J_{sc}$ (mA/cm <sup>2</sup> ) | $V_{oc}$ (V) | FF (%) |
|---------|--------------------------------|--------------|--------|
| 10.46   | 17.61                          | 0.92         | 64.74  |
| 13.73   | 20.95                          | 0.90         | 73.16  |
| 12.81   | 20.92                          | 0.88         | 69.25  |
| 11.32   | 18.98                          | 0.90         | 66.62  |
| 10.61   | 19.42                          | 0.87         | 62.62  |
| 12.96   | 20.16                          | 0.93         | 69.17  |
| 11.85   | 17.35                          | 0.98         | 70.03  |
| 10.61   | 17.51                          | 0.94         | 64.40  |
| 12.74   | 17.75                          | 0.95         | 75.37  |
| 11.59   | 17.23                          | 0.95         | 70.63  |
| 12.77   | 18.97                          | 0.93         | 72.41  |
| 12.69   | 18.24                          | 0.98         | 71.36  |
| 11.42   | 17.27                          | 0.94         | 70.29  |
| 12.41   | 18.61                          | 0.93         | 71.76  |
| 12.73   | 18.73                          | 0.93         | 73.10  |
| 12.50   | 18.65                          | 0.92         | 73.00  |
| 11.97   | 18.22                          | 0.93         | 70.70  |
| 9.78    | 16.46                          | 0.93         | 63.91  |
| 11.97   | 17.80                          | 0.91         | 74.18  |
| 12.49   | 19.38                          | 0.91         | 71.13  |
| 11.85   | 18.80                          | 0.91         | 69.55  |
| 12.51   | 19.86                          | 0.90         | 70.33  |
| 11.58   | 19.13                          | 0.90         | 67.60  |
| 12.90   | 19.07                          | 0.96         | 70.20  |
| 12.56   | 19.34                          | 0.94         | 69.01  |
| 11.62   | 19.66                          | 0.87         | 67.75  |
| 11.19   | 19.36                          | 0.87         | 66.28  |

|       |       |      |       |
|-------|-------|------|-------|
| 12.35 | 18.72 | 0.94 | 70.11 |
| 12.30 | 19.49 | 0.90 | 70.48 |
| 12.04 | 18.63 | 0.91 | 71.28 |

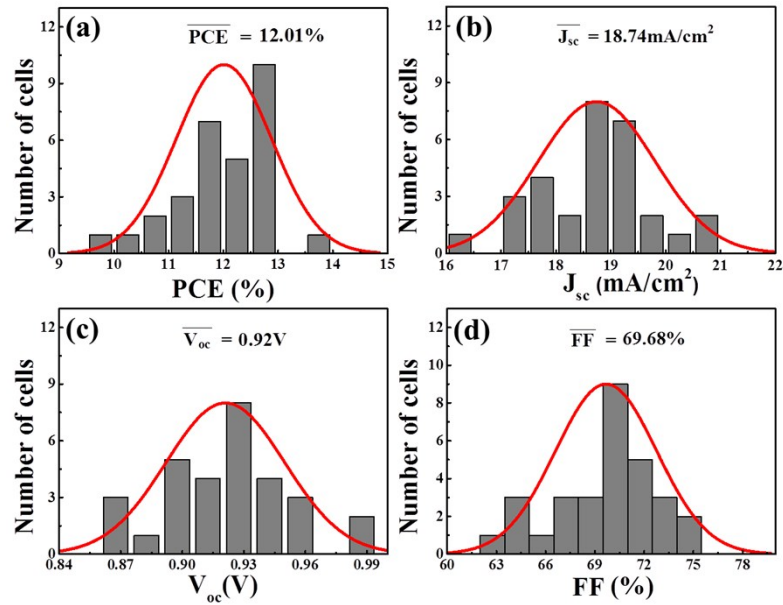

**Figure S5.** Histogram of PCE,  $V_{oc}$ , FF and  $J_{sc}$  measured from 30 solar cells with CdSe/PCBM composite as ETL. The averaged value for each parameter is also shown.

**Table S2.** Series resistance ( $R_s$ ) and shunt resistance ( $R_{sh}$ ) of devices with pure PCBM and CdSe/PCBM composite with 1%, 5% and 10% ratio of CdSe as ETL.

| ETL  | $R_s$ (ohm) | $R_{sh}$ (ohm) |
|------|-------------|----------------|
| PCBM | 65.76       | 5151.07        |
| 1%   | 56.62       | 5421.21        |
| 5%   | 48.88       | 6023.12        |
| 10%  | 53.57       | 4679.68        |

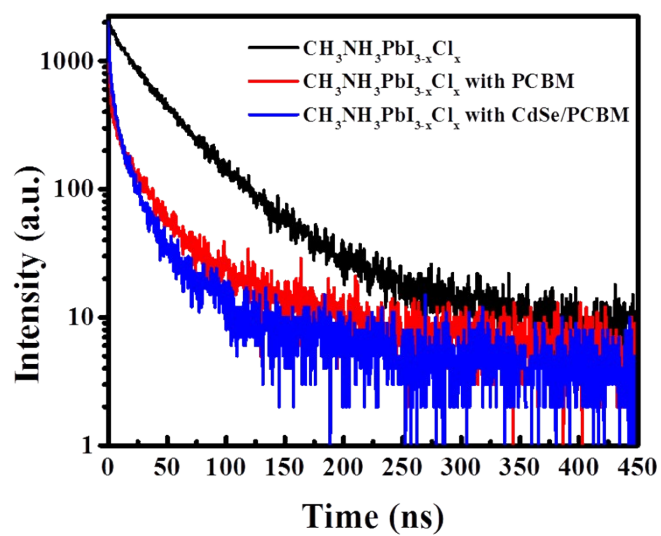

**Figure S6.** PL lifetime of pure  $\text{CH}_3\text{NH}_3\text{PbI}_{3-x}\text{Cl}_x$  layer,  $\text{CH}_3\text{NH}_3\text{PbI}_{3-x}\text{Cl}_x$  layer with PCBM and CdSe/PCBM composite as ETL at 365 nm.

**Table S3.** Photovoltaic parameters of solar cell by using CdSe QDs as ETL.

| PCE (%) | $J_{sc}$ (mA/cm <sup>2</sup> ) | $V_{oc}$ (V) | FF (%) |
|---------|--------------------------------|--------------|--------|
| 0.96    | 2.24                           | 0.74         | 58.50  |
